## CORRECTION

# Correction: Chromosomal Integrity after UV Irradiation Requires FANCD2-Mediated Repair of Double Strand Breaks

María Belén Federico, María Belén Vallerga, Analía Radl, Natalia Soledad Paviolo, José Luis Bocco, Marina Di Giorgio, Gastón Soria, Vanesa Gottifredi

In [Fig 3B](#) of this article [1], the representative image of a GFP-Pol  $\eta$  nucleus before UV irradiation is incorrect as it shows a GFP-Pol  $\nu$  nucleus. This image was previously published in Fig 4A of [2]. An updated version of [Fig 3](#) is provided with this notice in which the incorrect image has been replaced by with an image showing a GFP-Pol  $\eta$  nucleus pre-UV irradiation. Additional GFP-Pol  $\eta$  nucleus images are provided in [S1 File](#), and quantitative data underlying [Fig 3B](#) are provided in [S2 File](#).

In [S4C Fig](#) in [1], the panels for  $\gamma$ H2AX and DAPI in PD20 cells without UV irradiation (NT) are incorrect as they are inadvertent partial duplications of the corresponding panels for PD20 + D2 cells. An updated version of [S4C Fig](#) is provided as [S3 File](#). This issue does not affect the quantification presented in [S4B Fig](#). The quantitative data underlying [S4A–S4B Fig](#) is provided in [S4 File](#) of this notice.

In addition, the primary data underlying results in this article were not included with the published article, although the Data Availability Statement for this article stated, “All relevant data are within the paper and its Supporting Information files.” With this Correction, the authors provide the original raw data in [S4 File](#) and uncropped Western blot images in [S5 File](#).

The authors apologize for the errors in the published article.

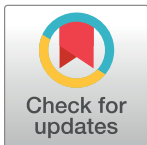

## OPEN ACCESS

**Citation:** Federico MB, Vallerga MB, Radl A, Paviolo NS, Bocco JL, Giorgio MD, et al. (2023) Correction: Chromosomal Integrity after UV Irradiation Requires FANCD2-Mediated Repair of Double Strand Breaks. *PLoS Genet* 19(12): e1011094. <https://doi.org/10.1371/journal.pgen.1011094>

**Published:** December 20, 2023

**Copyright:** © 2023 Federico et al. This is an open access article distributed under the terms of the [Creative Commons Attribution License](#), which permits unrestricted use, distribution, and reproduction in any medium, provided the original author and source are credited.

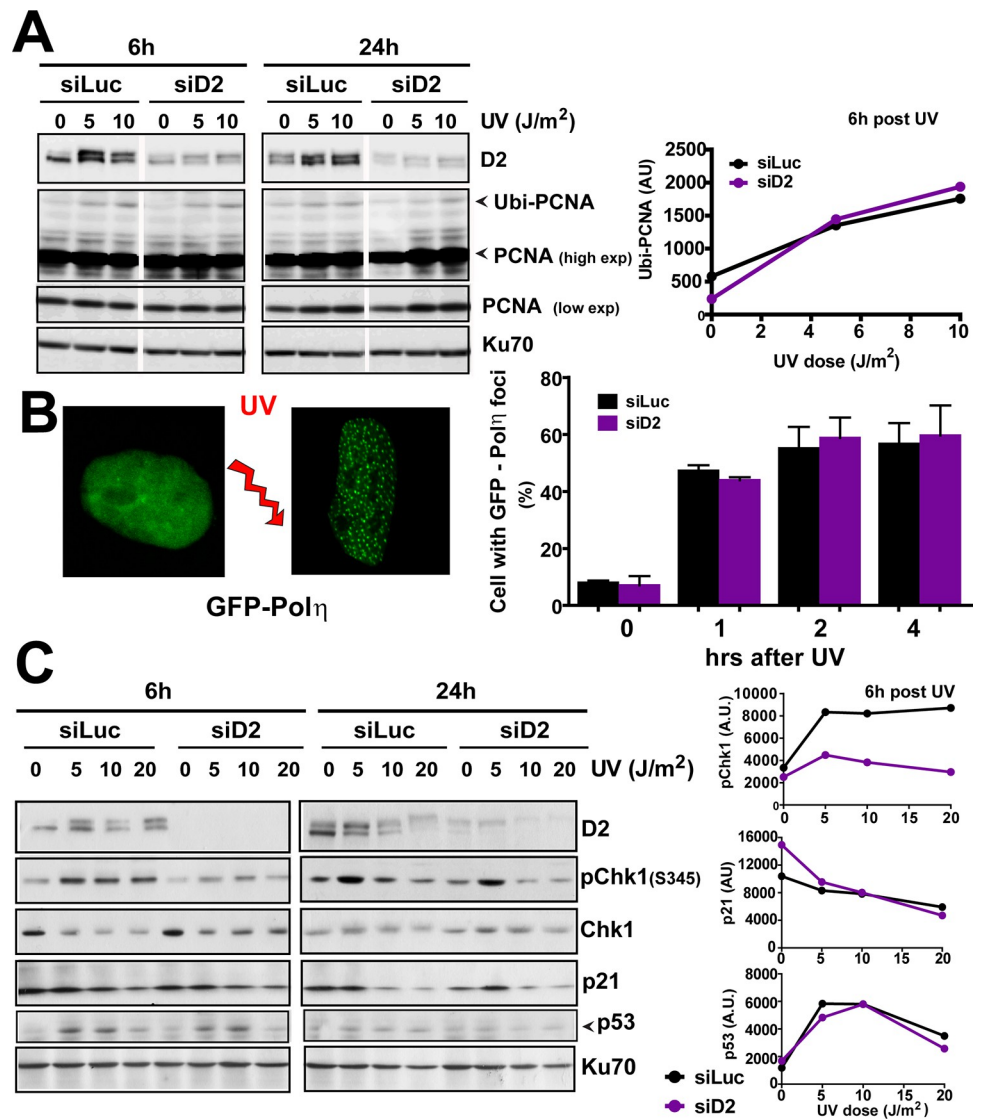

**Fig 3. FANCD2 depletion does not modulate TLS or checkpoint markers after UV irradiation.** A) W.B. showing the extent of PCNA ubiquitination in control and D2 depleted samples after the indicated doses of UV irradiation in U2OS cells. Images belong to lanes within the same gel and correspond to the same exposure. Quantification of Ubi-PCNA levels 6 hours post-UV is shown on the right. B) Percentage of U2OS cells with more than 10 GFP-Pol  $\eta$  foci at the indicated times after UV radiation (5 J/m<sup>2</sup>). C) W.B. showing phospho-Chk1 (S3545), Chk1, p53 and p21 levels in U2OS transfected with control and FANCD2 siRNAs. Images belong to lanes within the same gel and correspond to the same exposure. Quantifications of p-Chk1, p53 and p21 normalized to KU70 for the 6-hours' time point are shown on the right. Figure is representative of 3 independent experiments for each panel.

<https://doi.org/10.1371/journal.pgen.1011094.g001>

### Supporting information

**S1 File. Representative GFP-Pol  $\eta$  and GFP-Pol nuclei pre- and post-UV irradiation.**

(TIF)

**S2 File. Quantitative data underlying Fig 3B.** Data provided in Excel and GraphPad format.

(ZIP)

**S3 File. Corrected S4 Fig from [1].**  $\gamma$ H2AX and DAPI panels in PD20 cells without UV irradiation (NT) have been replaced.

(TIF)

**S4 File. Raw quantitative data underlying the results in [1].**  
(XLSX)

**S5 File. Original Western blot images.** (A) Annotated original Western blot images, and (B) individual original Western blot images.  
(ZIP)

## References

1. Federico MB, Vallerger MB, Radl A, Paviolo NS, Bocco JL, Di Giorgio M, et al. (2016) Chromosomal Integrity after UV Irradiation Requires FANCD2-Mediated Repair of Double Strand Breaks. *PLoS Genet* 12(1): e1005792. <https://doi.org/10.1371/journal.pgen.1005792> PMID: 26765540
2. Mansilla Sabrina F., Soria Gastón, María Belén Vallerger Martín Habif, Wilner Martínez-López Carol Prives, Gottifredi Vanesa, UV-triggered p21 degradation facilitates damaged-DNA replication and preserves genomic stability, *Nucleic Acids Research*, Volume 41, Issue 14, 1 August 2013, Pages 6942–6951, <https://doi.org/10.1093/nar/gkt475> PMID: 23723248
